# Supplementary material
Source: publisher site journal article supplement (http://static.cambridge.org/content/id/urn:cambridge.org:id:article:S1832427419000276/resource/name/S1832427419000276supp001.docx)
Supplement: Supplementary file 1 [file S1832427419000276supp001.docx]

**Supplementary material**

**
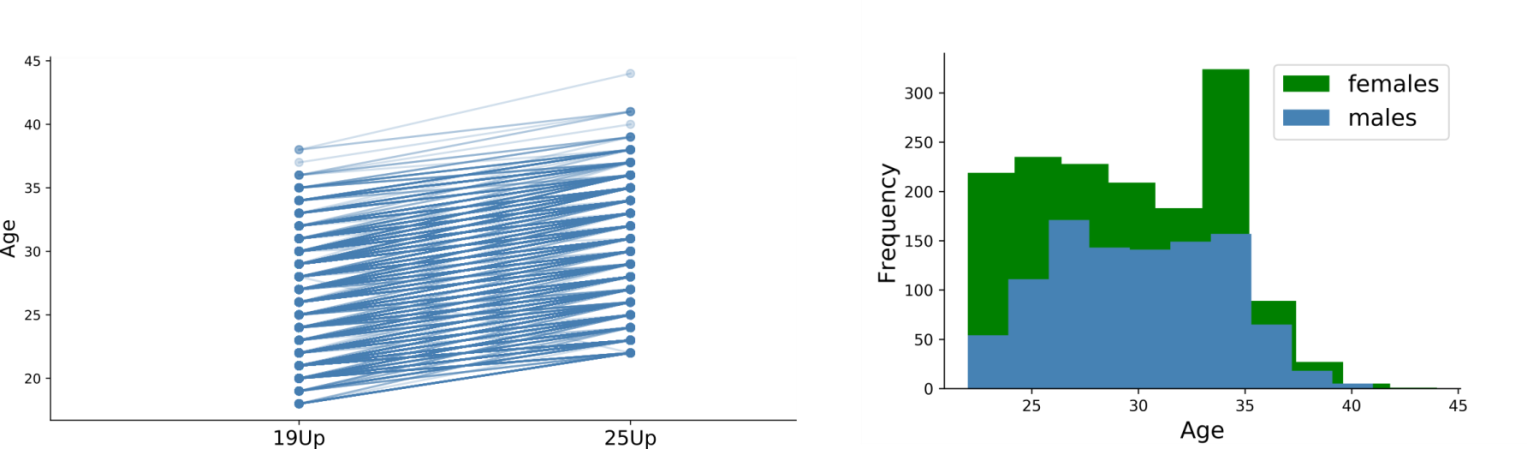
**

**Supplementary Figure 1: Age distribution of the 25Up Cohort**

Left panel depicts the increase of age between the 19Up and 25Up cohorts. Right side depicts 25Up age distribution stratified by sex.

**Supplementary Figure 2: Response to invitation to participate in the 25Up study**

Pie chart depicts the distribution of participants’ responses upon receiving an invitation to participate in the 25Up study. Completed refers to individuals that have completed at least TFU1.


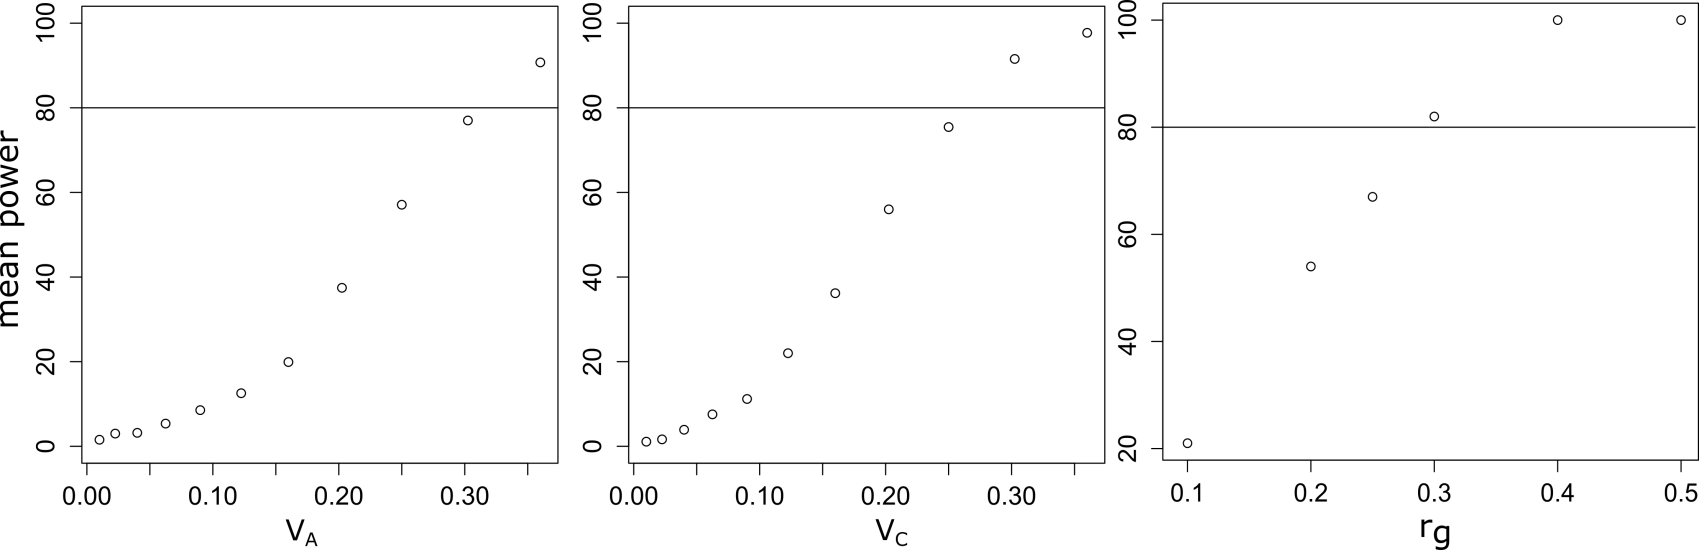


**Supplementary Figure 3: Twin study power on the 25Up Cohort.**

Results of simulations of power analysis through simulations of phenotypes following an ACE variance composition (see methods). The panels depict the power to detect an additive genetic component (left) and a common environment component (right).


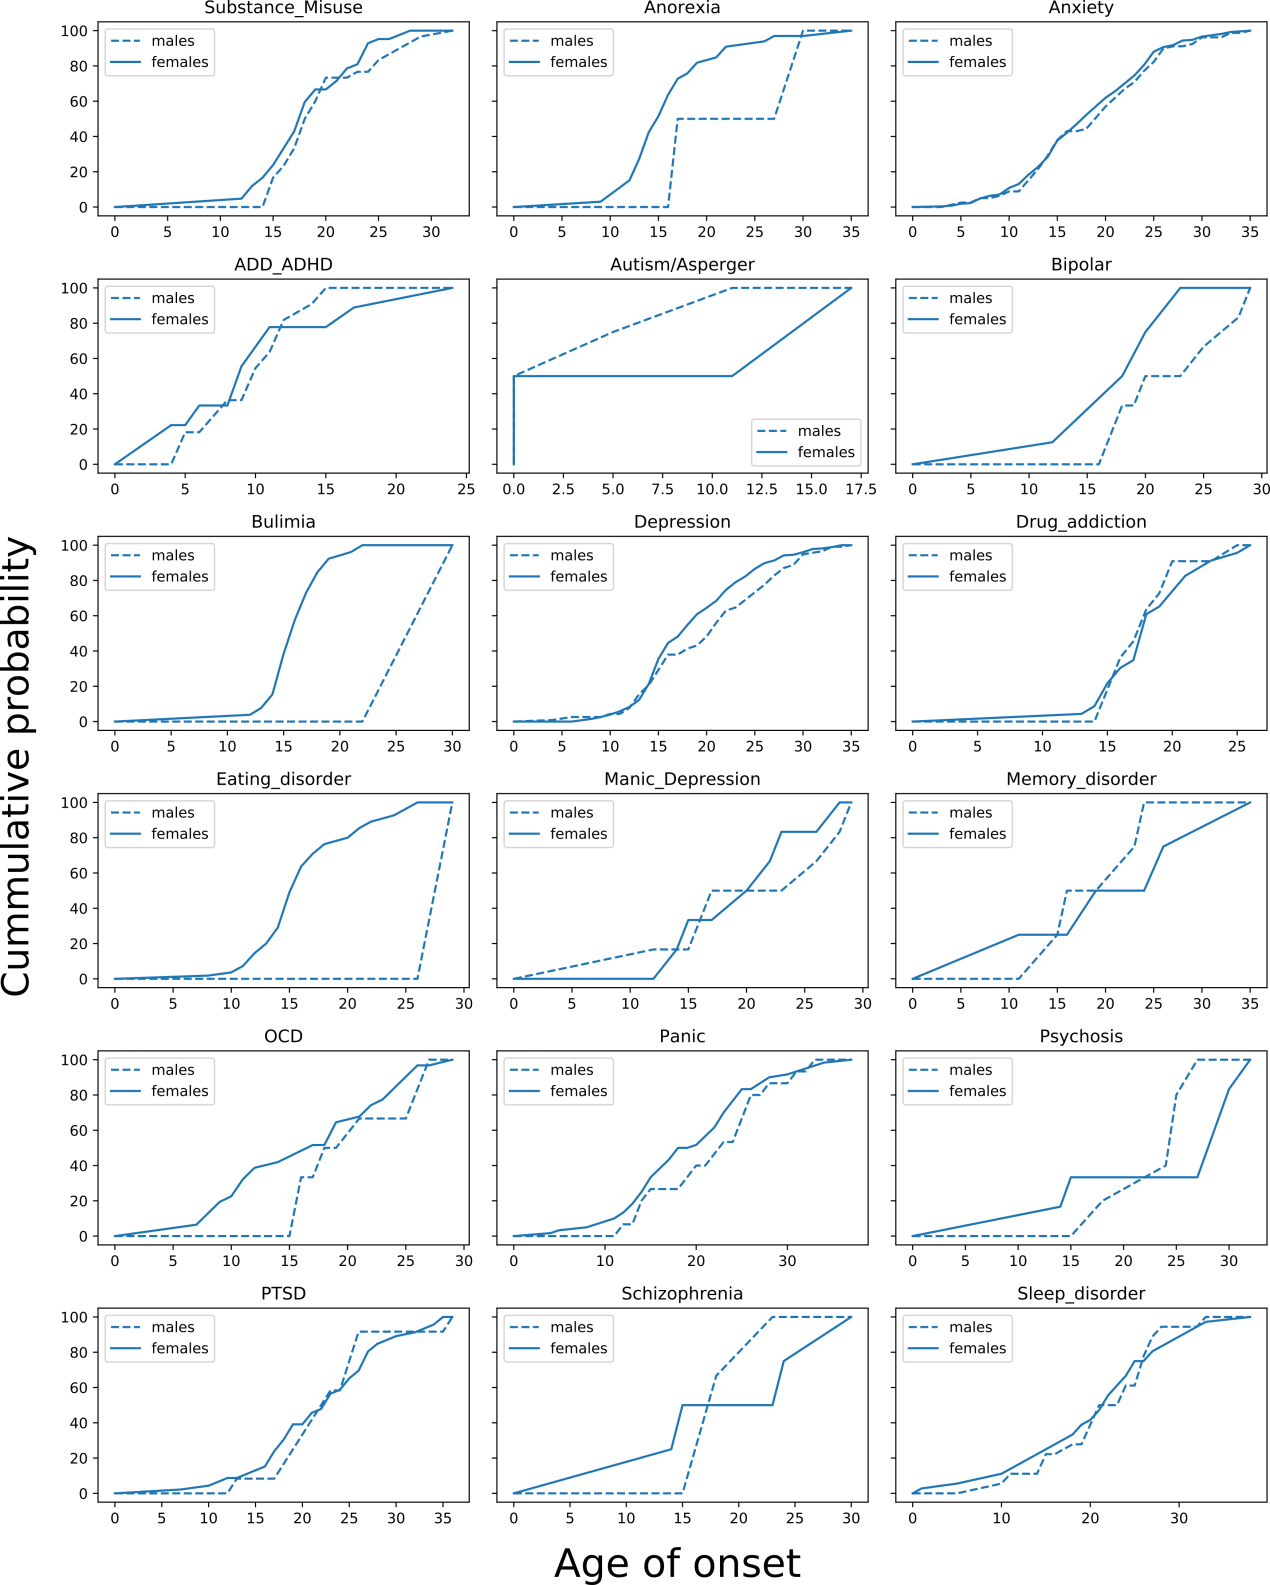


**Supplementary Figure 4: 25Up self-reported conditions age of onset**

Plots depict the cumulative probability for each disorder and its relationship with age of onset stratified by sex.
